# Supplementary material
Source: PubMed Central journal article supplement (PMC5842429)

**Supplementary figure 1. Targeting LSCs via receptor-specific antibody-drug conjugates** A cytotoxic drug is covalently conjugated to a monoclonal antibody which has the capacity for binding to a specific cell surface antigen expressed specifically on the surface of LSC. When the antibody binds to the LSC surface antigen, it delivers its anticancer cytotoxic cargo into the target cell.

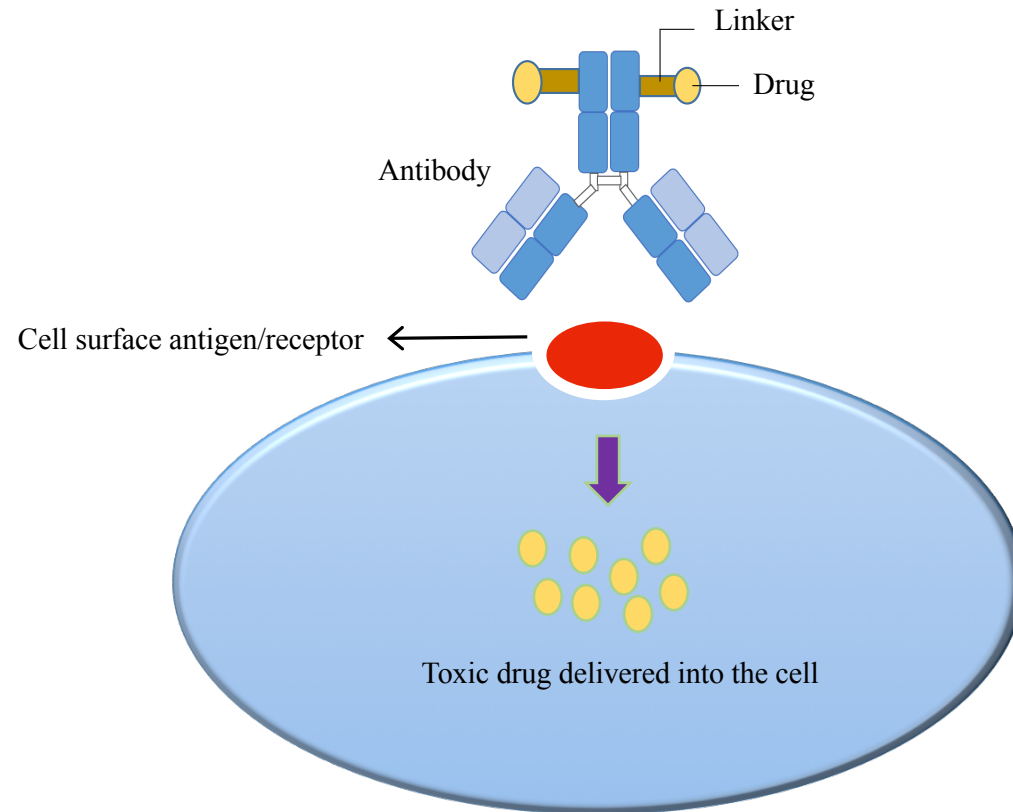

Supplement: NIHMS912319-supplement-Supp_fig1.pdf [file NIHMS912319-supplement-Supp_fig1.pdf]
