# Supplementary material
Source: PubMed Central journal article supplement (PMC5842429)

**Supplementary figure 2. Differentiation therapy for targeting LSCs** Different agents including retinoids (retinoic acid and its related compounds) and iron metabolism disruptors such as deferoxamine and deferasirox can initiate differentiation pathway in cancer cells. The induction of terminal differentiation in immature and undifferentiated LSCs may lead to their death and elimination from the body.

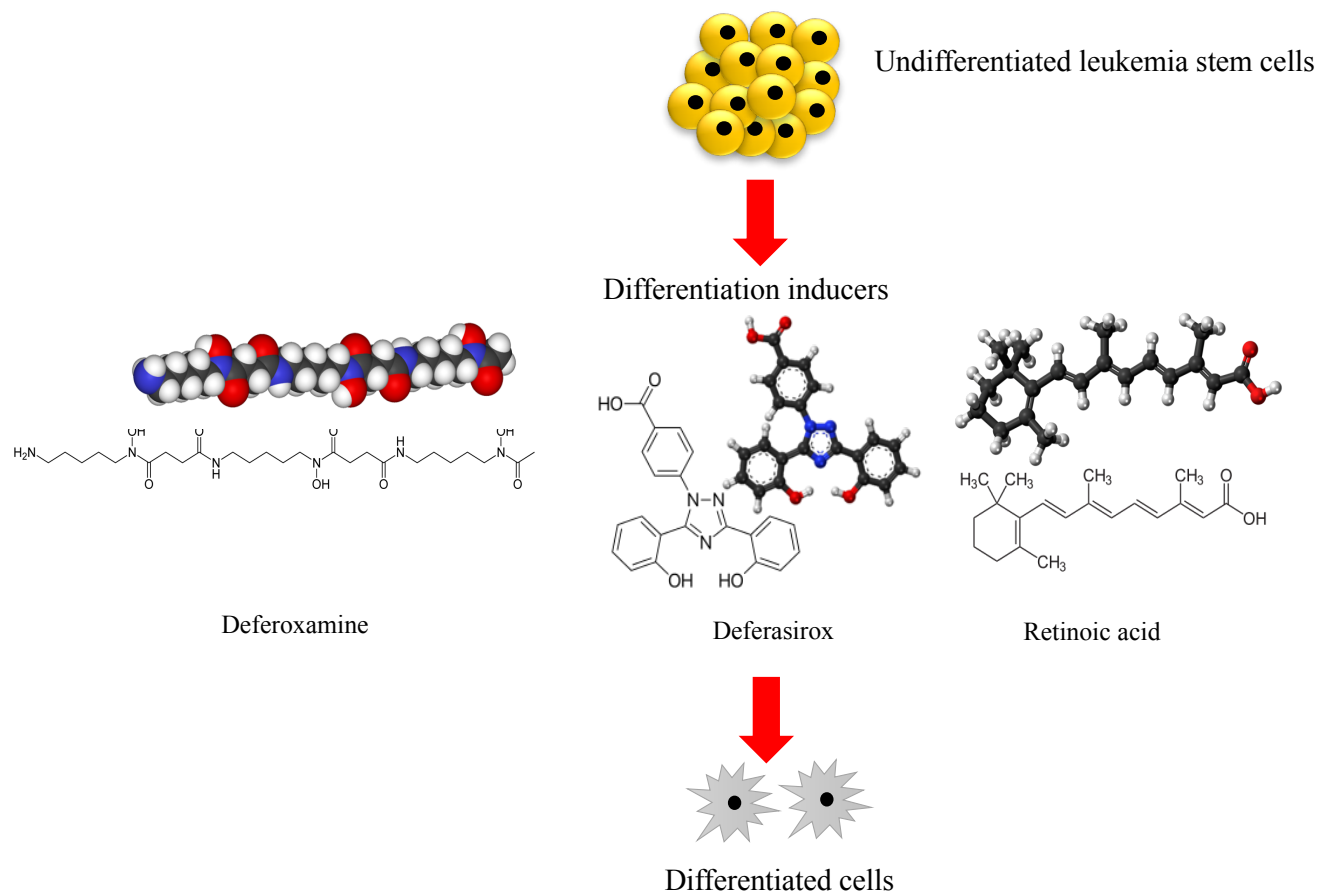

Supplement: NIHMS912319-supplement-supp_fig2.pdf [file NIHMS912319-supplement-supp_fig2.pdf]
