# Supplementary material
Source: PubMed Central journal article supplement (PMC5842429)

### Supplementary figure 3.

#### Signaling pathways influencing leukemic stem cell phenotypes

As stated in the text, several self-renewal pathways are involved in leukemic stem cell survival. Besides the importance of these signaling pathways, several niche factors and interactions with other signaling pathways have been shown to play an important role in maintaining leukemic stem cell phenotypes.

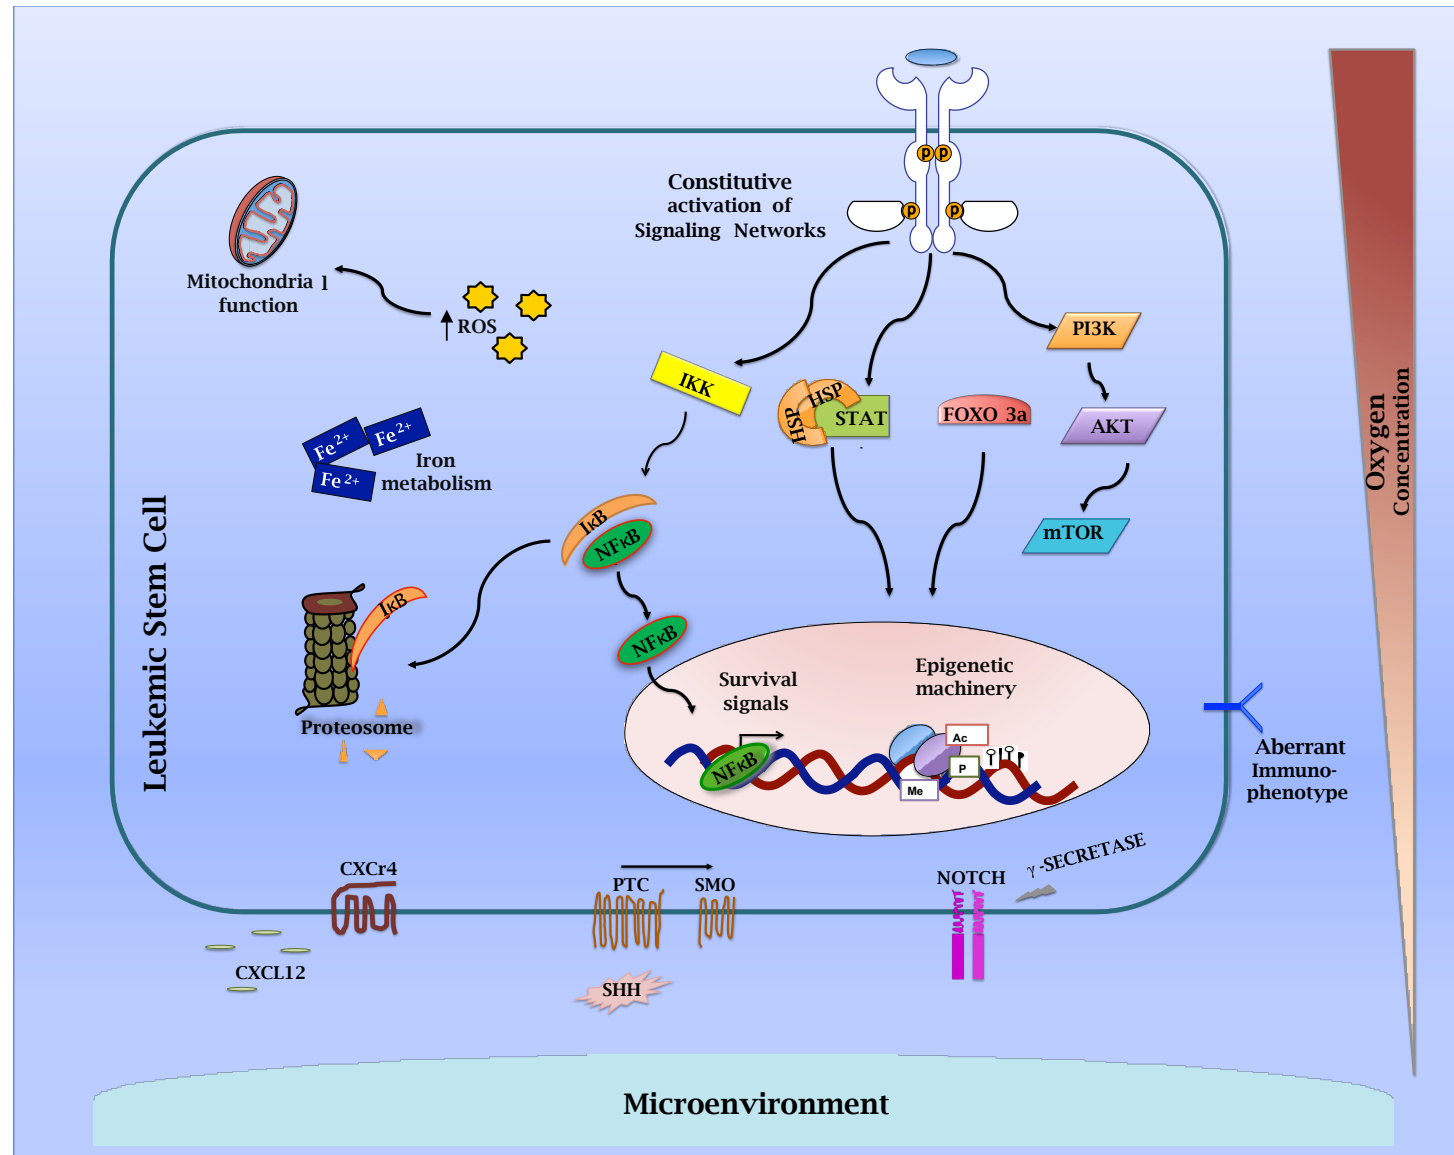

Supplement: NIHMS912319-supplement-supp_fig3.pdf [file NIHMS912319-supplement-supp_fig3.pdf]
